# Supplementary material
Source: publisher figshare collection journal article supplement (https://tandf.figshare.com/ndownloader/files/21491712)

## Supplementary materials

### **Sustained delivery of prilocaine and lidocaine using depot microemulsion system: *In vitro*, *ex vivo* and *in vivo* animal studies**

Xiaomin Zhang <sup>a</sup>, Minyan Dang <sup>b</sup>, Wenzhi Zhang <sup>b</sup>, Yan Lei <sup>b</sup>, Wentao Zhou <sup>c</sup>

<sup>a</sup> Department of Neurology, The Second People's Hospital of Yunnan Province, Yunnan, 650021, China

<sup>b</sup> Innoscience Research Sdn Bhd, Jalan Subang Jaya, Selangor, 47650, Malaysia

<sup>c</sup> Department of Anesthesiology, High-tech Branch of Shaanxi Second People's Hospital, Shaanxi, 710005, China

\* Corresponding author at: Department of Anesthesiology, High-tech Branch of Shaanxi Second People's Hospital, No. 3 Gaoxin Road, Xi'an, Shaanxi, 710005, China

Tel.: +86 18991211559

E-mail address: seygx123@sina.com (W. Zhou)

## Supplementary material Part I: Pseudo-ternary phase diagrams

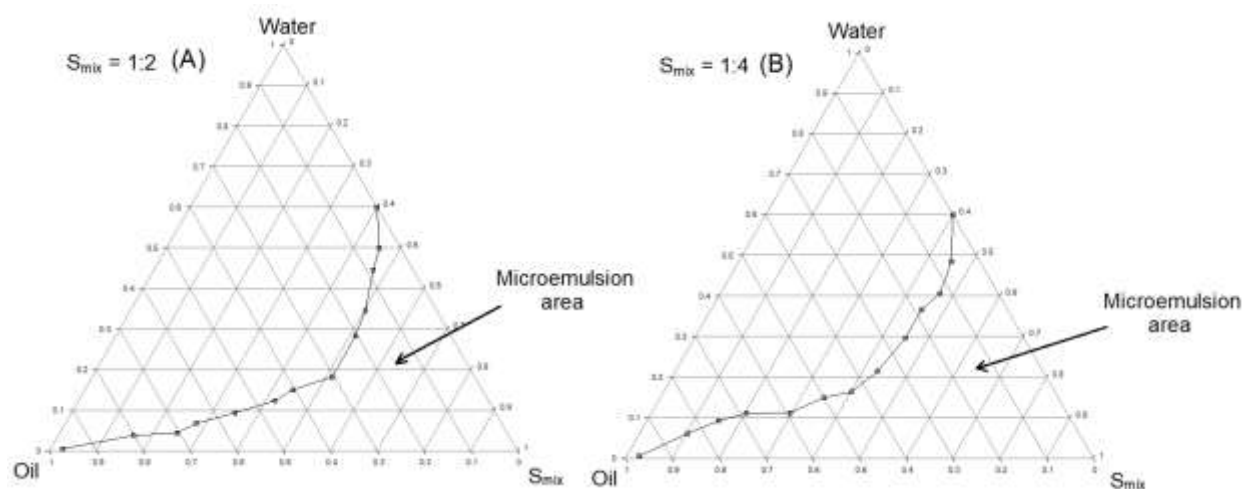

**Fig. SM-1.** Pseudo-ternary phase diagrams at  $S_{mix}$  [1:2 (A) and 1:4 (B)].  $S_{mix}$  = Pluronic F127: PEG 200.

## Supplementary material Part II: TEM images

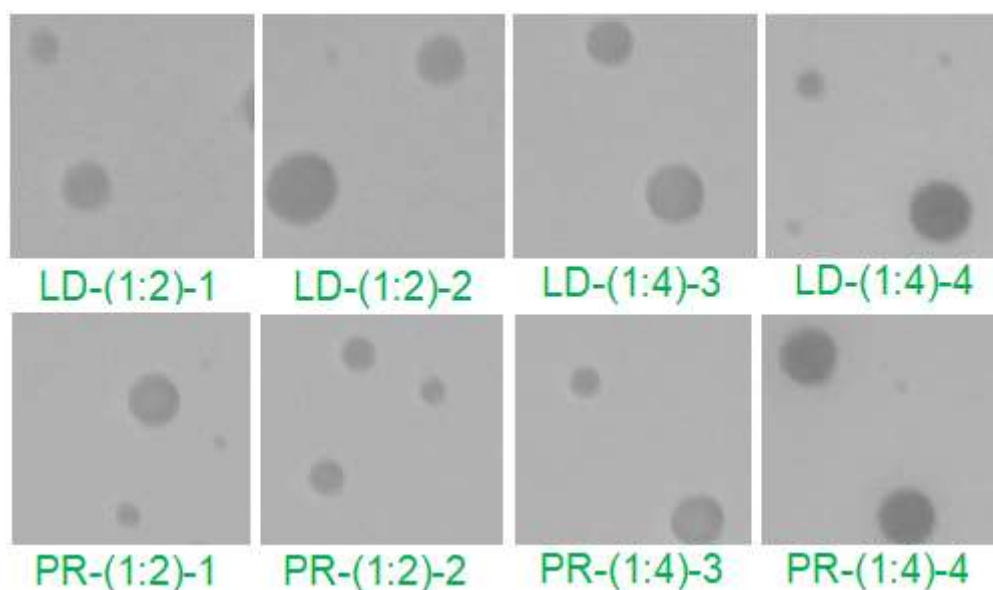

### Supplementary material Part III: Stability of microemulsions with time

**Table**

Transmittance data of LD-(1:4)-3 and PR-(1:4)-3 batches.

| Batches    | Day-1      | Day-30     | Day-60     | Day-90     |
|------------|------------|------------|------------|------------|
| LD-(1:4)-3 | 98.2 ± 0.2 | 99.1 ± 0.1 | 98.8 ± 0.2 | 99.1 ± 0.2 |
| PR-(1:4)-3 | 99.5 ± 0.1 | 98.8 ± 0.2 | 99.6 ± 0.1 | 99.4 ± 0.2 |

### Supplementary material Part IV: Thermodynamic stability

**Table**

Thermodynamic stability data of lidocaine and prilocaine loaded microemulsions.

| Batches    | Visual appearance | Centrifugation | Heating-cooling cycles | Freeze thaw cycles |
|------------|-------------------|----------------|------------------------|--------------------|
| LD-(1:2)-1 | Transparent       | √              | √                      | ×                  |
| LD-(1:2)-2 | Transparent       | √              | √                      | ×                  |
| LD-(1:4)-3 | Transparent       | √              | √                      | √                  |
| LD-(1:4)-4 | Transparent       | √              | √                      | √                  |
| PR-(1:2)-1 | Transparent       | √              | √                      | ×                  |
| PR-(1:2)-2 | Transparent       | √              | √                      | ×                  |
| PR-(1:4)-3 | Transparent       | √              | √                      | √                  |
| PR-(1:4)-4 | Transparent       | √              | √                      | √                  |

### Supplementary material Part V: Skin irritation study images

Marketed ointment USP

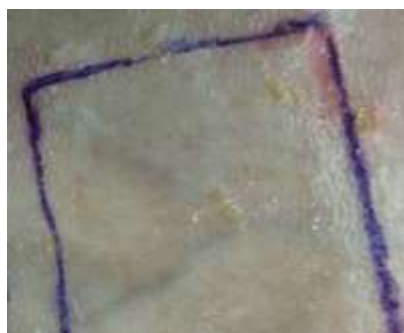

LD-(1:4)-4

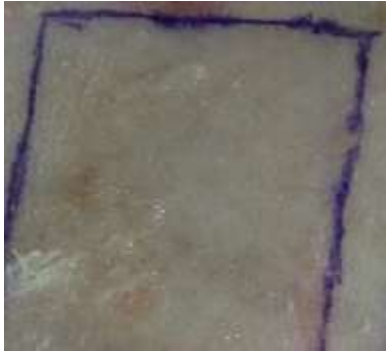

PR-(1:4)-4

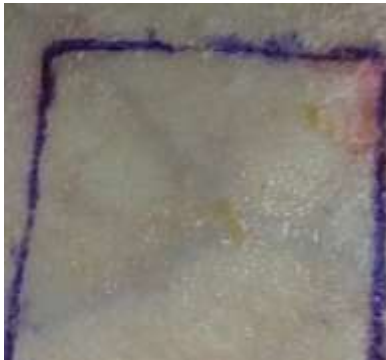

Supplement: Supplementary file 1 [file 21491712]
